# Supplementary material for: Diosgenin derivatives developed from Pd(ii) catalysed dehydrogenative coupling exert an effect on breast cancer cells by abrogating their growth and facilitating apoptosis via regulating the AKT1 pathway
Source: Royal Society of Chemistry journal article supplement (doi:10.1039/d2dt00514j), 2022-01-01
Supplement: d2dt00514j1.pdf [file d2dt00514j1.pdf]

## **Diosgenin derivatives developed from Pd(II) catalysed dehydrogenative coupling exert effect on breast cancer cells by abrogating growth and facilitating apoptosis via regulating AKT1 pathway**

### **Supplementary information**

#### **Experimental details**

Oven dried clean glass wares and organic reagents purchased from commercial chemical vendors were used and were dried according to the standard procedure.<sup>S1</sup> Potassium tetrachloropalladate(II)  $K_2[PdCl_4]$  was prepared as reported elsewhere.<sup>S2</sup> The ligands 4-oxo-4*H*-chromene-3-carbaldehyde-4(*N*)-substituted thiosemicarbazones were prepared as reported by our group earlier.<sup>S3</sup> Melting points were determined by using a RAAGA apparatus. Elemental analyses were measured by using Vario EL III CHNS analyzer. FT-IR spectra were recorded with JASCO FT-IR 4100 instrument between 400 and 4000  $cm^{-1}$  as KBr pellets. Electronic spectra were run on a JASCO V-630 spectrophotometer, using DMSO as a solvent in 200-800 nm range.  $^1H$  NMR spectra were recorded at room temperature in  $CDCl_3$  and  $DMSO-d_6$  by using a Bruker 400 MHz instrument. Chemical shifts ( $\delta$ ) were presented in parts per million (ppm) with reference to tetramethylsilane (TMS). The mass spectra of the complexes and diosgenin coupled products were recorded using LCMS-2010A SHIMADZU instrument.

#### **Results and discussion**

##### **IR Spectroscopy**

Formation of ligands and their metal complexes was preliminarily confirmed by using IR spectroscopy. A very strong band in the IR spectra of the ligands around  $\sim 1533$ - $1598\text{ cm}^{-1}$  corresponding to azomethine group,<sup>S3,S4</sup> was shifted to  $1545$ - $1550\text{ cm}^{-1}$  upon complexation with Pd(II) ion, confirming the involvement of azomethine nitrogen in coordination.<sup>S3,S4</sup> A characteristic absorption band around  $1627$ - $1641\text{ cm}^{-1}$  in the ligands was due to  $\nu_{C=O}$  (ring carbonyl) vibration.<sup>S3,S5</sup> In the complexes, the  $\nu_{C=O}$  vibration was observed around  $1611$ - $1612\text{ cm}^{-1}$ , which demonstrated the coordination of ketonic oxygen of chromone to palladium ion.<sup>S3,S5</sup> A band assignable to  $C=S$  of the ligands was present at  $844$ - $850\text{ cm}^{-1}$ , disappeared in the spectra of the complexes and a new band appeared at  $752$ - $760\text{ cm}^{-1}$  indicating the C-S coordination of sulfur atom after enolization and subsequent deprotonation.<sup>S6</sup>

## Electronic spectroscopy

The electronic spectra of the complexes recorded in DMSO showed five bands in the regions of 216-262, 282-317, 399-408, 422-429 and 445-456 nm in the UV-Visible spectra (Figure S1). The bands around 216-262 and 282-317 nm corresponding to intra ligand transitions and the bands at 399-408 and 422-456 nm were due to the metal to ligand charge transfer (MLCT) transitions which are similar to the reported square planar palladium(II) complexes.<sup>S5,S7-S10</sup>

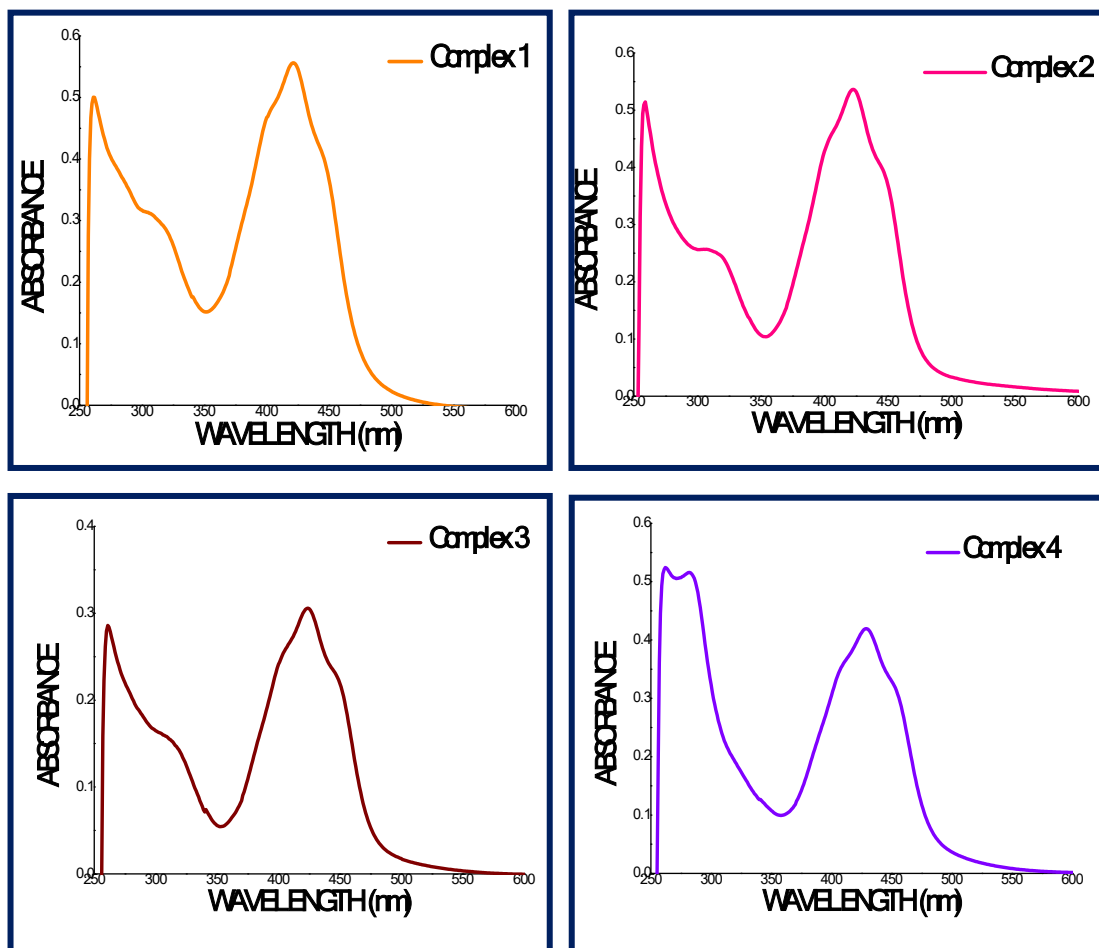

Fig. S1. UV-Visible spectra of the Pd(II) complexes (C1-C4)

## <sup>1</sup>H NMR spectroscopy

<sup>1</sup>H NMR spectra of the ligands 4-oxo-4*H*-chromene-3-carbaldehyde-4(*N*)-substituted thiosemicarbazones,<sup>S11</sup> were compared with the complexes recorded in DMSO-*d*<sub>6</sub> at room temperature (Figure S2-S5). N(2)-H proton of the ligands at  $\delta$  11.52-11.93 ppm completely disappeared in the complexes indicating the coordination of sulfur atom after deprotonation i.e.

in thiolate form.<sup>S3,S5,S12</sup> Complex **[Pd(FC-tsc)Cl]** (**C1**) showed a singlet at  $\delta$  7.25 ppm owing to the  $\text{NH}_2$  protons. Terminal  $-\text{NH}$  protons of the complexes **[Pd(FC-mtsc)Cl]** (**C2**), **[Pd(FC-etsc)Cl]** (**C3**) and **[Pd(FC-ptsc)Cl]** (**C4**) were observed as singlets at  $\delta$  7.66, 7.72 and 9.94 ppm respectively.<sup>S13</sup> The spectrum of the complex **[Pd(FC-mtsc)Cl]** (**C2**) showed a doublet at  $\delta$  2.78-2.80 ppm for methyl protons. For the complex **[Pd(FC-etsc)Cl]** (**C3**), the signal for methyl protons has been observed as a triplet at  $\delta$  1.08-1.12 ppm. Further, a multiplet at  $\delta$  3.17-3.24 ppm was assigned to the methylene protons of **[Pd(FC-etsc)Cl]** (**C3**).<sup>S6,S13</sup>

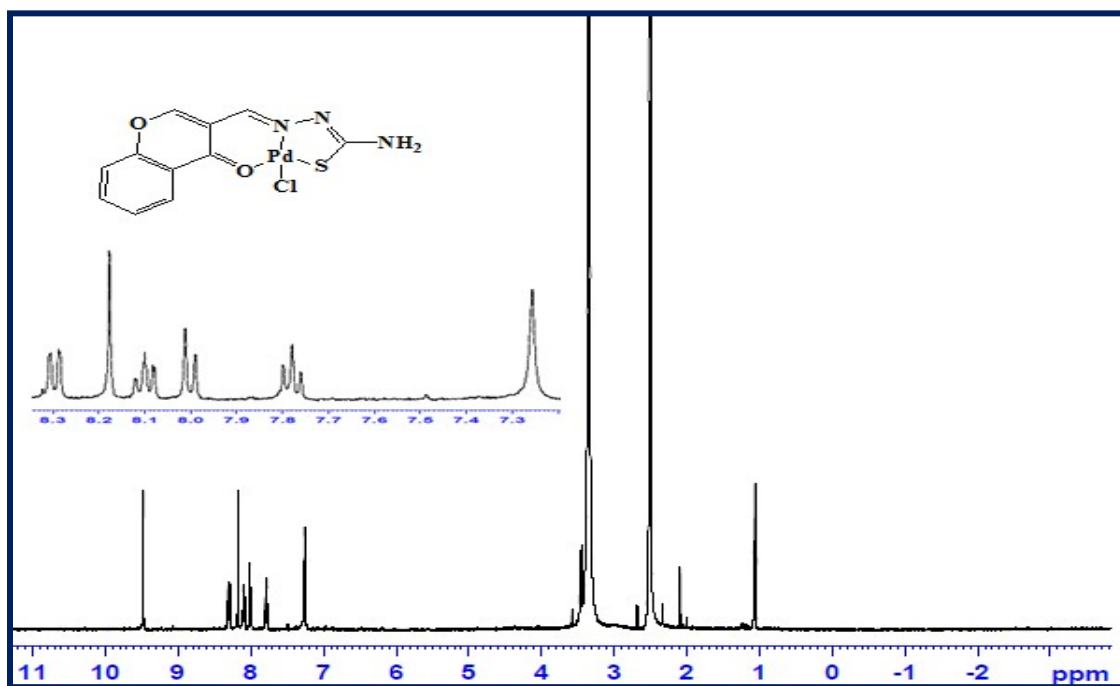

Fig. S2. <sup>1</sup>H NMR spectrum of complex **[Pd(FC-tsc)Cl]** (**C1**)

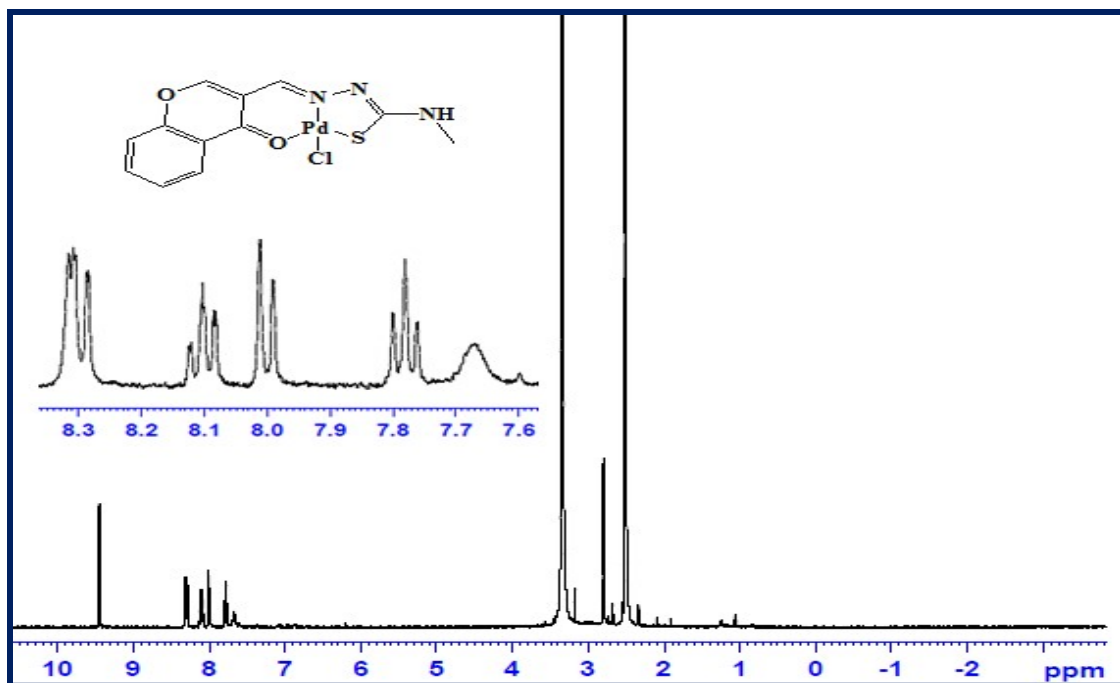

Fig. S3. <sup>1</sup>H NMR spectrum of complex [Pd(FC-mtsc)Cl] (C2)

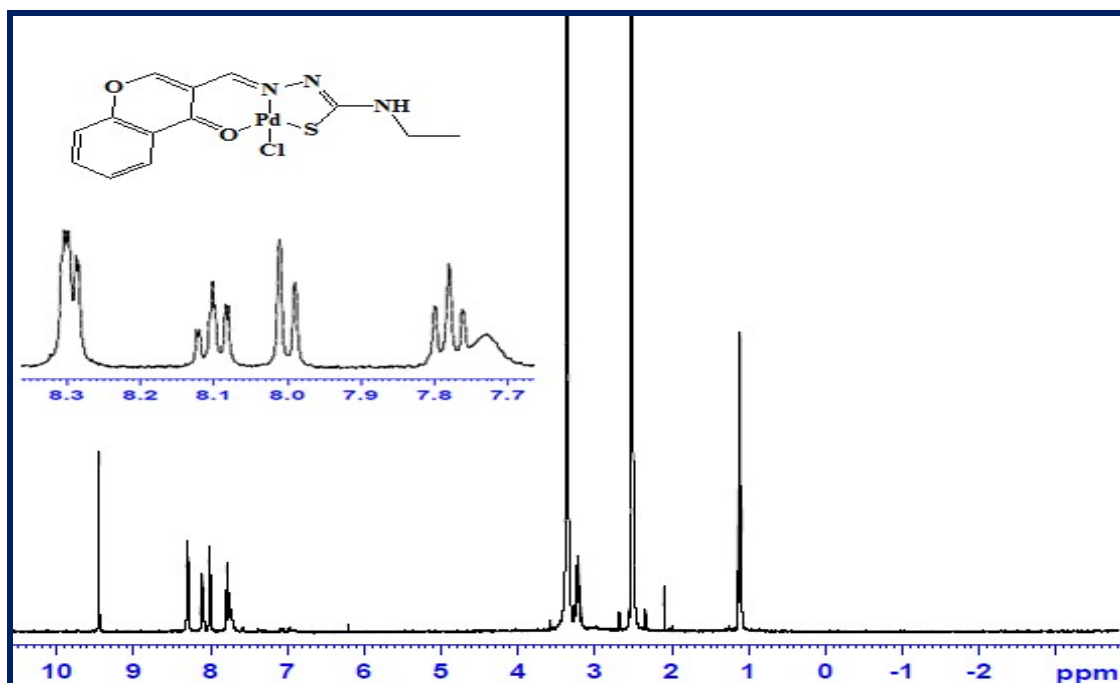

Fig. S4. <sup>1</sup>H NMR spectrum of complex [Pd(FC-etsc)Cl] (C3)

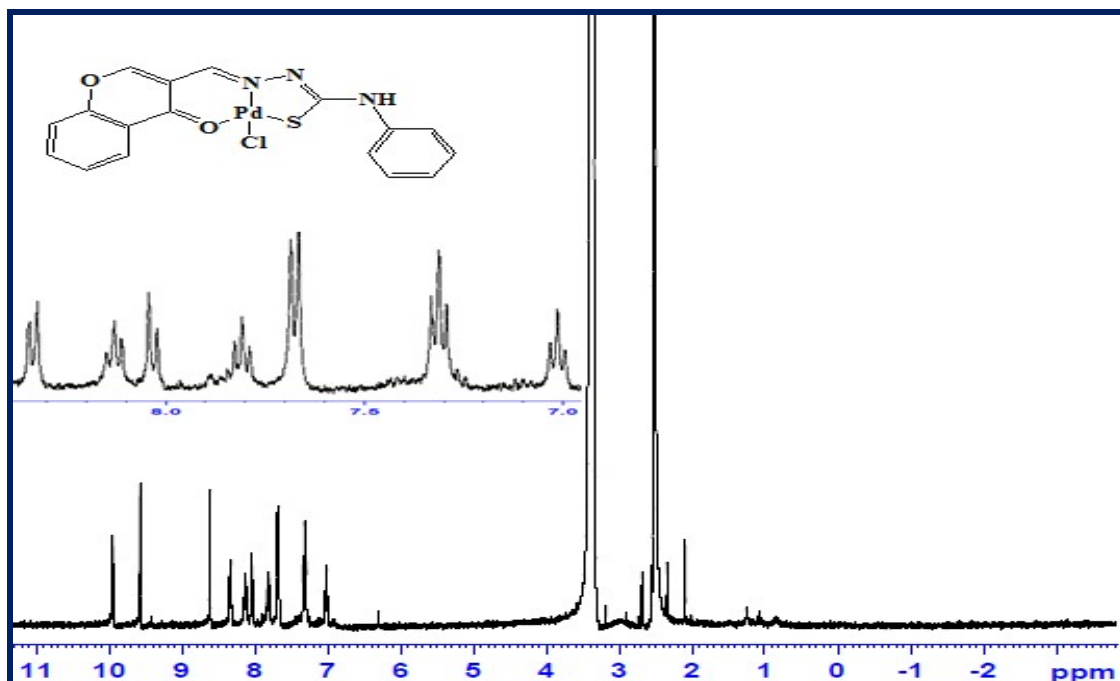

Fig. S5.  $^1\text{H}$  NMR spectrum of complex  $[\text{Pd}(\text{FC-ptsc})\text{Cl}]$  (C4)

### Mass spectral analysis

Mass spectra were recorded for all the complexes to support their molecular stoichiometry. They showed molecular ion peaks corresponding to  $[\text{M}+\text{H}]^+$  at 389.35 ( $[\text{Pd}(\text{FC-tsc})\text{Cl}]$  (C1)), 403.30 ( $[\text{Pd}(\text{FC-mtsc})\text{Cl}]$  (C2)), 417.35 ( $[\text{Pd}(\text{FC-etsc})\text{Cl}]$  (C3)) and 465.30 ( $[\text{Pd}(\text{FC-ptsc})\text{Cl}]$  (C4)) respectively (Fig. S6-S9).

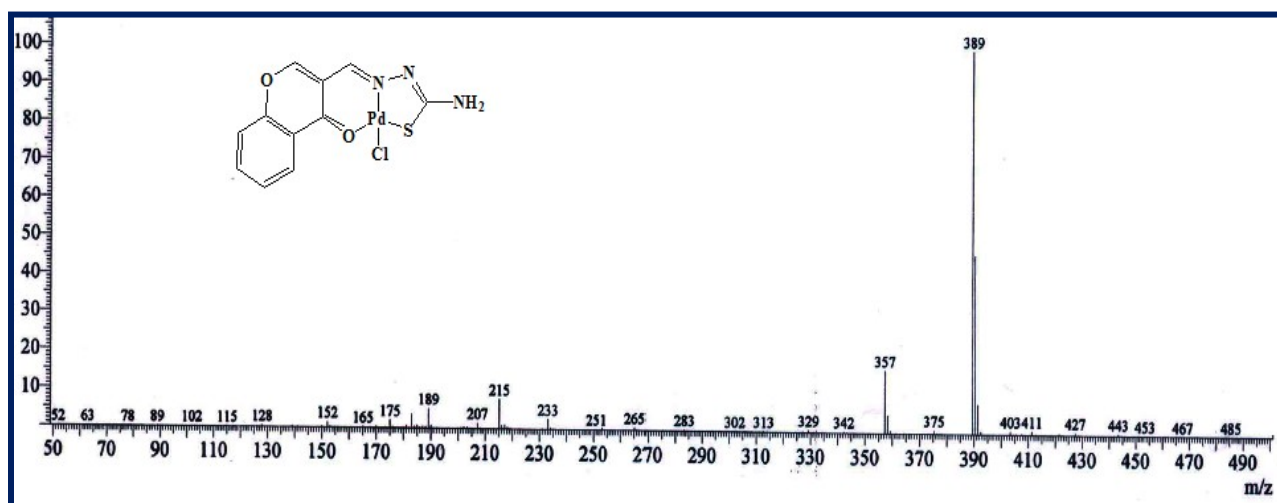

Fig. S6. LCMS spectrum of complex  $[\text{Pd}(\text{FC-tsc})\text{Cl}]$  (C1)

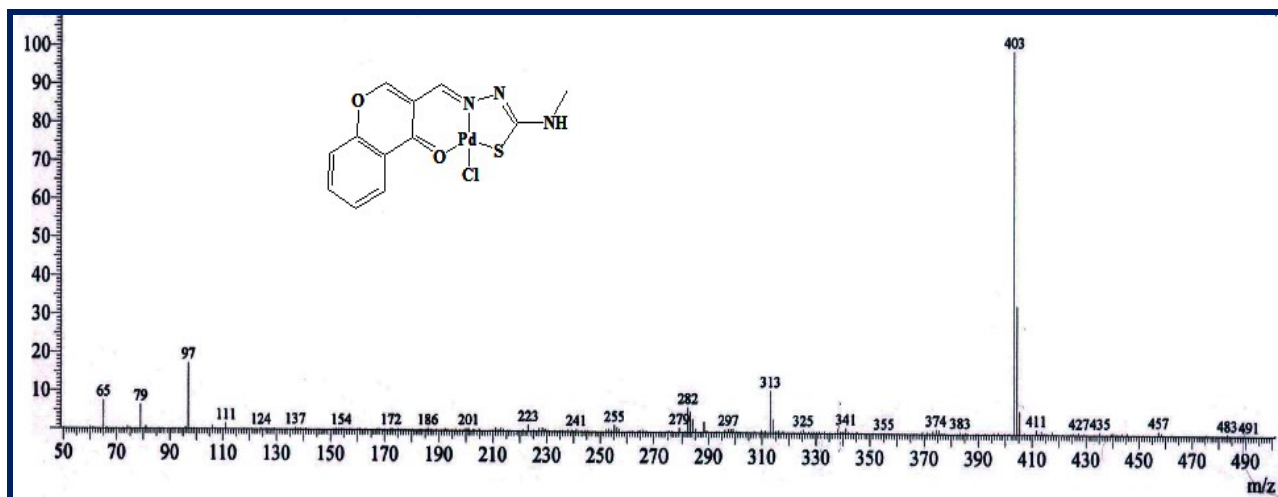

Fig. S7. LCMS spectrum of complex [Pd(FC-mtsc)Cl] (C2)

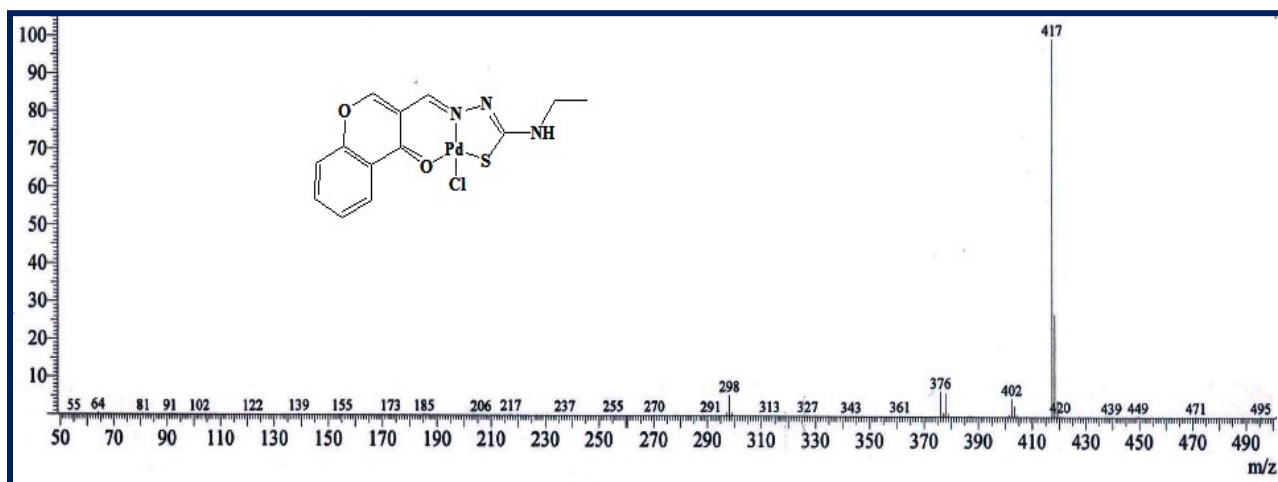

Fig. S8. LCMS spectrum of complex [Pd(FC-etsc)Cl] (C3)

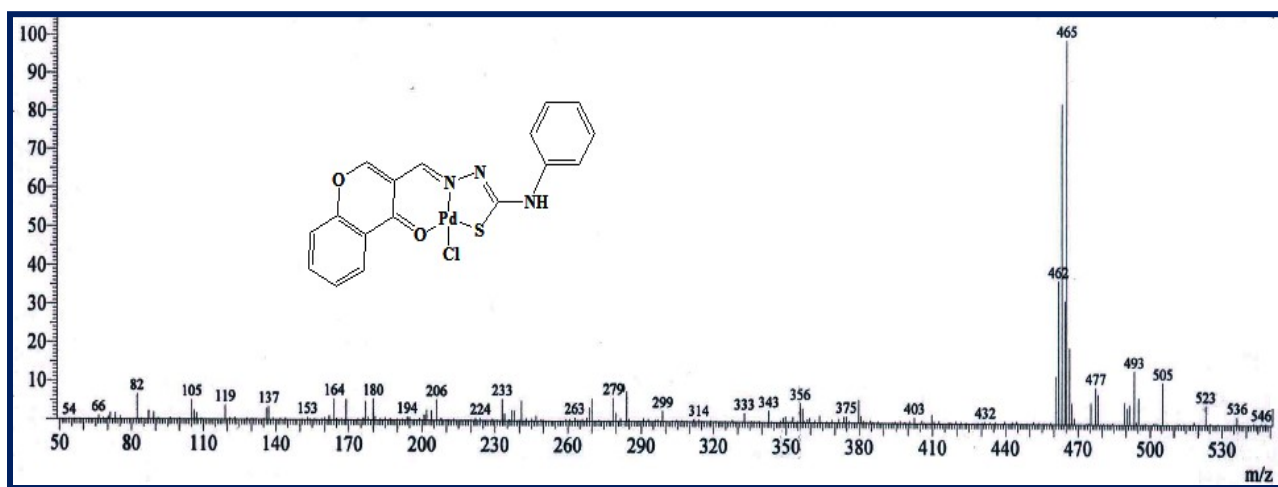

Fig. S9. LCMS spectrum of complex [Pd(FC-ptsc)Cl] (C4)

## X-ray crystallography

### Solid state structure of complex C1

Complex [Pd(FC-tsc)Cl] (C1) has been structurally characterized by X-ray diffraction analysis (Fig. 1; Table S1 and S2). It belongs to triclinic crystal system with P -1 space group. There is one DMF and water molecule in the crystal lattice came through the solvent of crystallisation. The ligand [H-FC-tsc] exhibited mononegative tridentate ONS coordination to the palladium ion, with Pd1-O1, Pd1-N1 and Pd1-S1 bond distances of 2.0695 (16), 1.9848 (19) and 2.2266 (7) Å respectively which were found to be similar with the reported palladium(II) square planar complexes [S14-S16]. A chloride ion occupied the fourth coordination site, thereby satisfying the +2 charge of the palladium ion. The metal ion with the coordinated ligand adopted a distorted square planar geometry having *cis* angles N1-Pd1-O1 (93°) and N1-Pd1-S1 (85°) and *trans* angles O1-Pd1-S1 (178°) and N1-Pd1-Cl1 (175°) which deviated significantly from ideal *cis* and *trans* angle.

**Table S1.** Crystal data and structure refinement for the complex C1

|                                 | [Pd(FC-tsc)Cl].DMF.H <sub>2</sub> O (C1)                             |                |
|---------------------------------|----------------------------------------------------------------------|----------------|
| Empirical formula               | C <sub>14</sub> H <sub>17</sub> Cl N <sub>4</sub> O <sub>4</sub> PdS |                |
| Formula weight                  | 479.22                                                               |                |
| Temperature                     | 100(2) K                                                             |                |
| Wavelength                      | 0.71073 Å                                                            |                |
| Crystal system                  | triclinic                                                            |                |
| Space group                     | P -1                                                                 |                |
| Unit cell dimensions            | a = 7.3080(19) Å                                                     | α = 88.662(6)° |
|                                 | b = 9.042(2) Å                                                       | β = 82.640(5)° |
|                                 | c = 13.221(3) Å                                                      | γ = 86.314(6)° |
| Volume                          | 864.6(4) Å <sup>3</sup>                                              |                |
| Z                               | 2                                                                    |                |
| Density                         | 1.841 Mg/m <sup>3</sup>                                              |                |
| Absorption coefficient          | 1.376 mm <sup>-1</sup>                                               |                |
| F(000)                          | 480                                                                  |                |
| Crystal size                    | 0.38 x 0.31 x 0.30 mm <sup>3</sup>                                   |                |
| Theta range for data collection | 2.760 to 28.400°.                                                    |                |
| Index ranges                    | -9≤h≤9, -12≤k≤12, -17≤l≤17                                           |                |
| Reflections collected           | 11272                                                                |                |
| Independent reflections         | 4261 [R(int) = 0.0439]                                               |                |

|                                   |                                             |
|-----------------------------------|---------------------------------------------|
| Completeness to theta = 25.242°   | 99.8 %                                      |
| Absorption correction             | Numerical                                   |
| Max. and min. transmission        | 0.7983 and 0.6979                           |
| Refinement method                 | Full-matrix least-squares on F <sup>2</sup> |
| Data/ restraints/ parameters      | 4261/ 338/ 291                              |
| Goodness-of-fit on F <sup>2</sup> | 1.026                                       |
| Final R indices [I>2σ(I)]         | R1 = 0.0280, wR2 = 0.0627                   |
| R indices (all data)              | R1 = 0.0334, wR2 = 0.0657                   |

**Table S2.** Selected bond lengths (Å) and angles (°) of complex **C1**

| <b>[Pd(FC-tsc)Cl].DMF.H<sub>2</sub>O (C1)</b> |            |
|-----------------------------------------------|------------|
| Pd(1)-N(1)                                    | 1.9848(19) |
| Pd(1)-O(1)                                    | 2.0695(16) |
| Pd(1)-S(1)                                    | 2.2266(7)  |
| Pd(1)-Cl(1)                                   | 2.3191(7)  |
| <b>Bond angles</b>                            |            |
| <b>[Pd(FC-tsc)Cl].DMF.H<sub>2</sub>O (C1)</b> |            |
| N1-Pd1-O1                                     | 93.49(7)   |
| N1-Pd1-S1                                     | 85.05(6)   |
| O1-Pd1-S1                                     | 178.21(5)  |
| N1-Pd1-Cl1                                    | 175.81(6)  |
| O1-Pd1-Cl1                                    | 90.67(5)   |
| S1-Pd1-Cl1                                    | 90.80(3)   |

### Hydrogen bonding interactions

There are four hydrogen bonding interactions were found in the complex **[Pd(FC-tsc)Cl] (C1)** - i) N2 atom of one molecule is intermolecularly hydrogen bonded with H3B(N3) of adjacent molecule, ii) H3A(N3) of one molecule showed hydrogen bonding to O3 atom of water molecule, iii) H3B(N3) of first molecule is hydrogen bonded to N2 atom of second molecule and iv) Cl1 atom of one molecule is hydrogen bonded to H3D(O3) of water molecule. These hydrogen bonding interactions gave a sheet like structure (Fig. S10; Table S3).



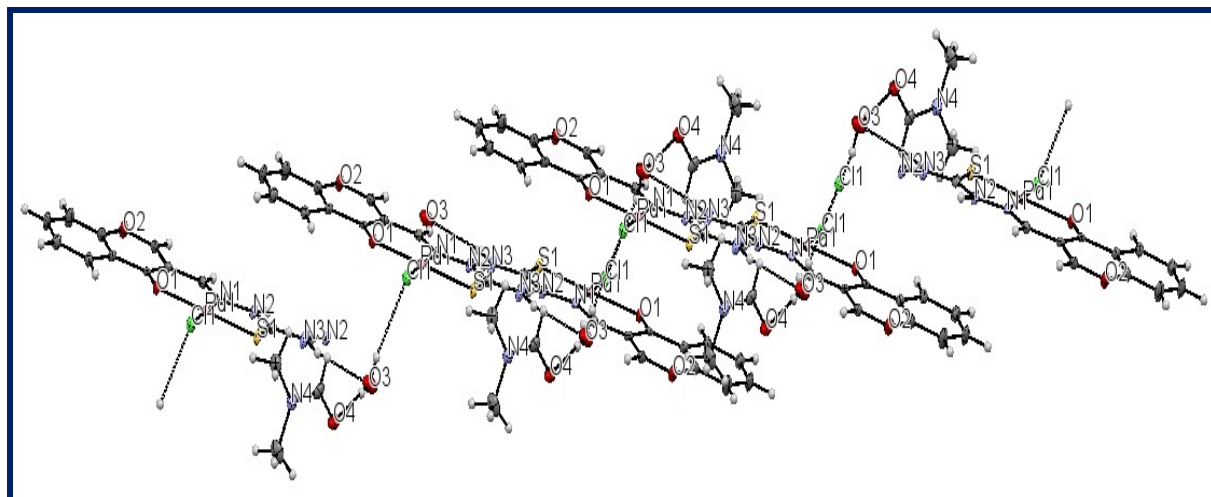

**Fig. S10.** ORTEP diagram of the complex **C1** with hydrogen bondings

**Table S3.** Hydrogen bonds for complex **C1** [ $\text{\AA}$  and  $^\circ$ ]

| D-H...A        | d(D-H)  | d(H...A) | d(D...A) | $\angle(\text{DHA})$ |
|----------------|---------|----------|----------|----------------------|
| O3-H3C...O4    | 0.69(3) | 2.02(3)  | 2.706(5) | 175(4)               |
| O3-H3C...O4A   | 0.69(3) | 2.19(3)  | 2.867(5) | 166(4)               |
| O3-H3D...C11#1 | 0.78(4) | 2.44(4)  | 3.208(3) | 166(3)               |
| N3-H3A...O3    | 0.84(3) | 2.31(3)  | 3.076(3) | 151(2)               |
| N3-H3B...N2#2  | 0.87(3) | 2.16(4)  | 3.021(3) | 173(3)               |

Symmetry transformations used to generate equivalent atoms:

#1  $x, y+1, z$  #2  $-x, -y+2, -z+1$

### Catalytic application of the Pd(II) complexes C1-C4

#### Optimization of reaction conditions

**Table S4.** Optimization of reaction conditions

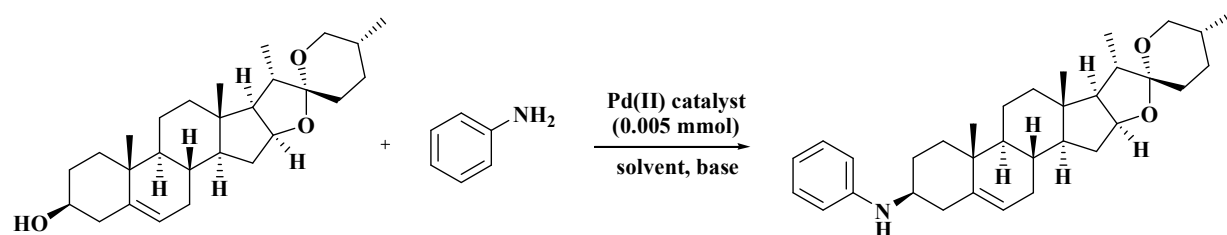

| Entry | Solvent            | Base<br>(mmol)   | Complex<br>(0.005 mmol) | Temperature<br>(°C) | Time<br>(h) | Yield<br>(%) <sup>a</sup> |
|-------|--------------------|------------------|-------------------------|---------------------|-------------|---------------------------|
| 1     | EtOH               | KOH (1.5)        | C1                      | rt                  | 4           | 61                        |
| 2     | <b>MeOH</b>        | <b>KOH (1.5)</b> | <b>C1</b>               | <b>rt</b>           | <b>4</b>    | <b>65</b>                 |
| 3     | CH <sub>3</sub> CN | KOH (1.5)        | C1                      | rt                  | 4           | 56                        |
| 4     | DMF                | KOH (1.5)        | C1                      | rt                  | 4           | 55                        |
| 5     | DMSO               | KOH (1.5)        | C1                      | rt                  | 4           | 48                        |
| 6     | CHCl <sub>3</sub>  | KOH (1.5)        | C1                      | rt                  | 4           | 21                        |
| 7     | DCM                | KOH (1.5)        | C1                      | rt                  | 4           | 33                        |
| 8     | Benzene            | KOH (1.5)        | C1                      | rt                  | 4           | 59                        |
| 9     | Toluene            | KOH (1.5)        | C1                      | rt                  | 4           | 53                        |
| 10    | Dioxane            | KOH (1.5)        | C1                      | rt                  | 4           | 56                        |
| 11    | 2-methoxyethanol   | KOH (1.5)        | C1                      | rt                  | 4           | 38                        |
| 12    | Isopropanol        | KOH (1.5)        | C1                      | rt                  | 4           | 36                        |
| 13    | MeOH               | KOH (1.5)        | C1                      | 50                  | 4           | 15                        |
| 14    | MeOH               | KOH (1.5)        | C1                      | 60                  | 4           | 23                        |
| 15    | MeOH               | KOH (1.5)        | C1                      | reflux              | 4           | 39                        |
| 16    | MeOH               | KOH (1.5)        | C2                      | rt                  | 4           | 53                        |
| 17    | MeOH               | KOH (1.5)        | C3                      | rt                  | 4           | 59                        |
| 18    | MeOH               | KOH (1.5)        | C4                      | rt                  | 4           | 61                        |

Reaction conditions: Diosgenin (1 mmol), amine (1 mmol), base (1.5 mmol), catalyst (0.005 mmol). rt - room temperature. <sup>a</sup>Isolated yield.

**Table S5.** Optimization by varying base

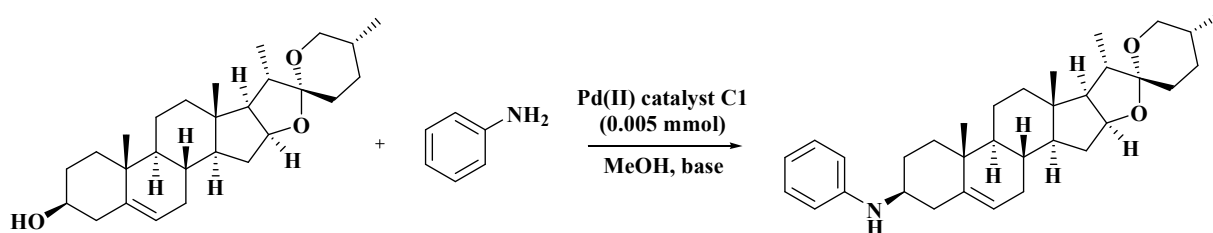

| Entry    | Base<br>(mmol)                        | Catalyst<br>(mmol) | Temperature | Time<br>(h) | Yield<br>(%) <sup>a</sup> |
|----------|---------------------------------------|--------------------|-------------|-------------|---------------------------|
| 1        | KOH (1.5)                             | 0.005              | rt          | 4           | 65                        |
| 2        | NaOH (1.5)                            | 0.005              | rt          | 4           | 61                        |
| 3        | K <sub>2</sub> CO <sub>3</sub> (1.5)  | 0.005              | rt          | 4           | 55                        |
| 4        | Na <sub>2</sub> CO <sub>3</sub> (1.5) | 0.005              | rt          | 4           | 46                        |
| 5        | Cs <sub>2</sub> CO <sub>3</sub> (1.5) | 0.005              | rt          | 4           | 37                        |
| 6        | Et <sub>3</sub> N (1.5)               | 0.005              | rt          | 4           | 43                        |
| 7        | KOH (1.5)                             | No catalyst        | rt          | 4           | NR                        |
| <b>8</b> | <b>No base</b>                        | <b>0.005</b>       | <b>rt</b>   | <b>4</b>    | <b>65</b>                 |

Reaction conditions: Diosgenin (1 mmol), amine (1 mmol). rt - room temperature. <sup>a</sup>Isolated yield. NR - No reaction

#### LCMS data for representative coupled products

**D7:** 453.300 [0.5M.CH<sub>3</sub>CN]<sup>+</sup>

**D8:** 852.950 [M]<sup>+</sup>

**D10:** 901.200 [M]<sup>+</sup>



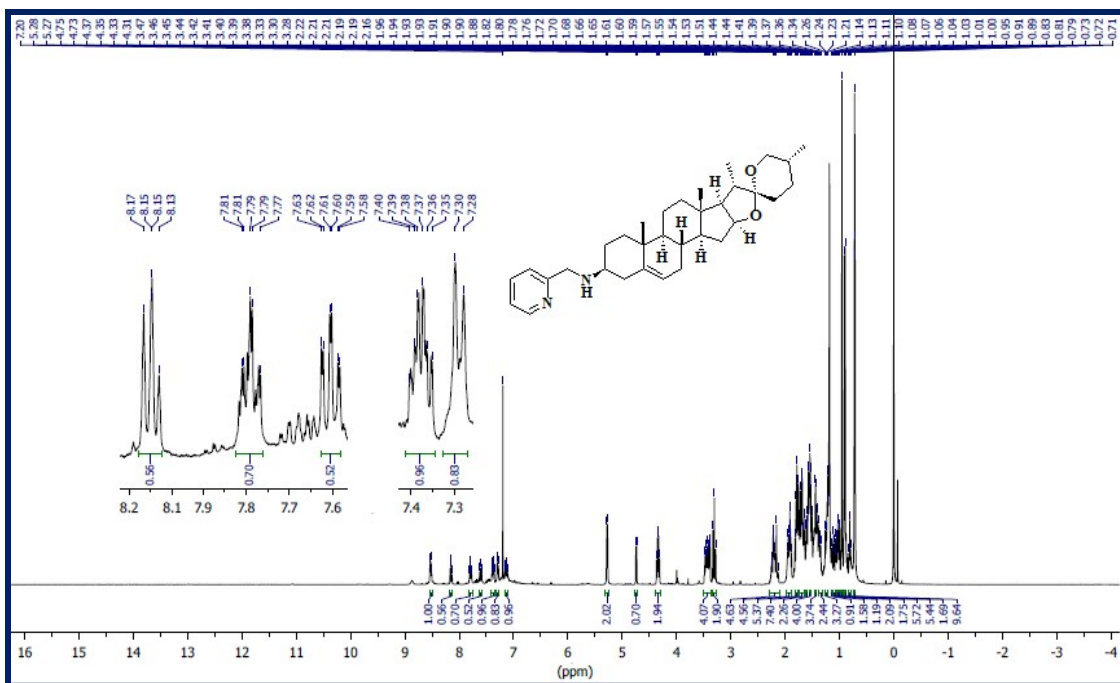

Fig. S13. <sup>1</sup>H NMR spectrum of D3

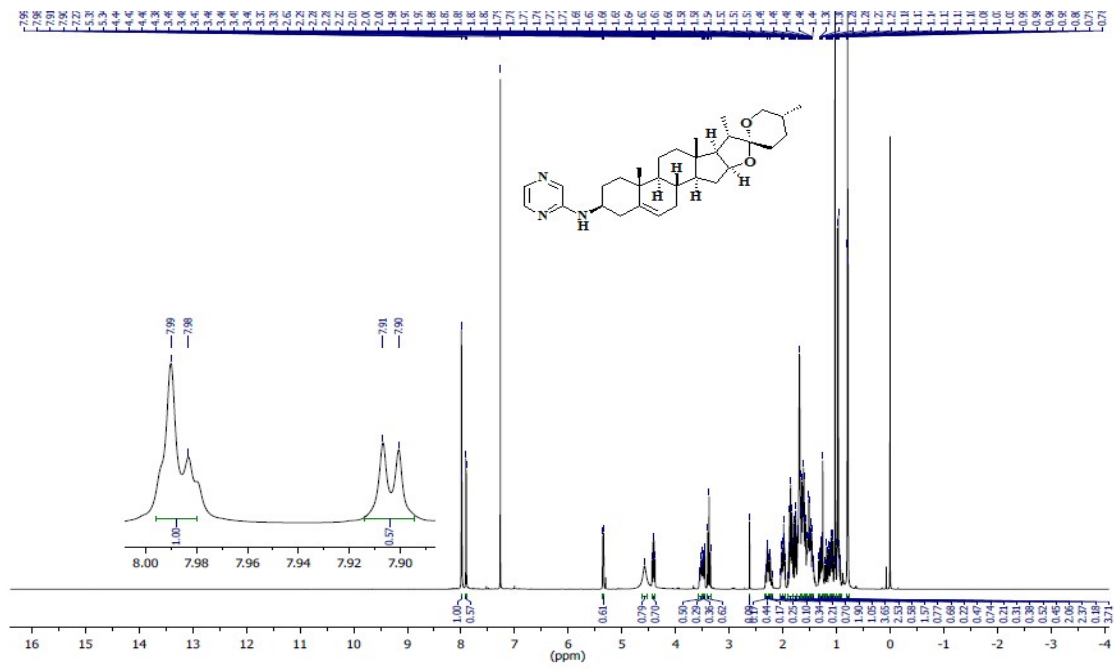

Fig. S14. <sup>1</sup>H NMR spectrum of D4

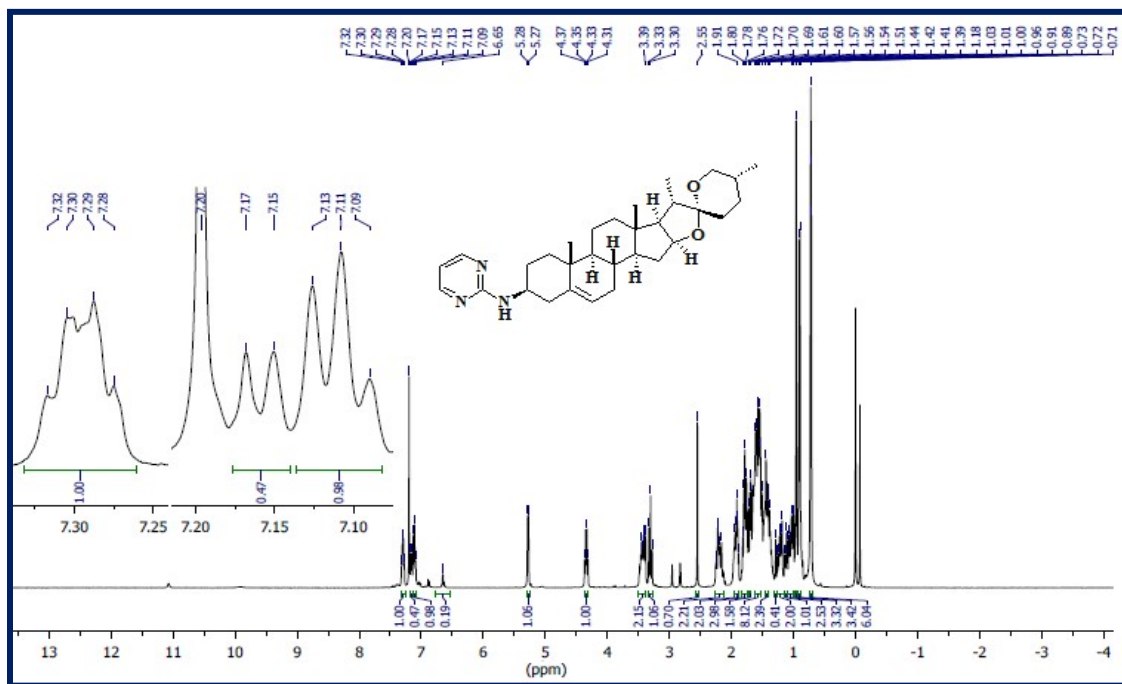

Fig. S15.  $^1\text{H}$  NMR spectrum of D5

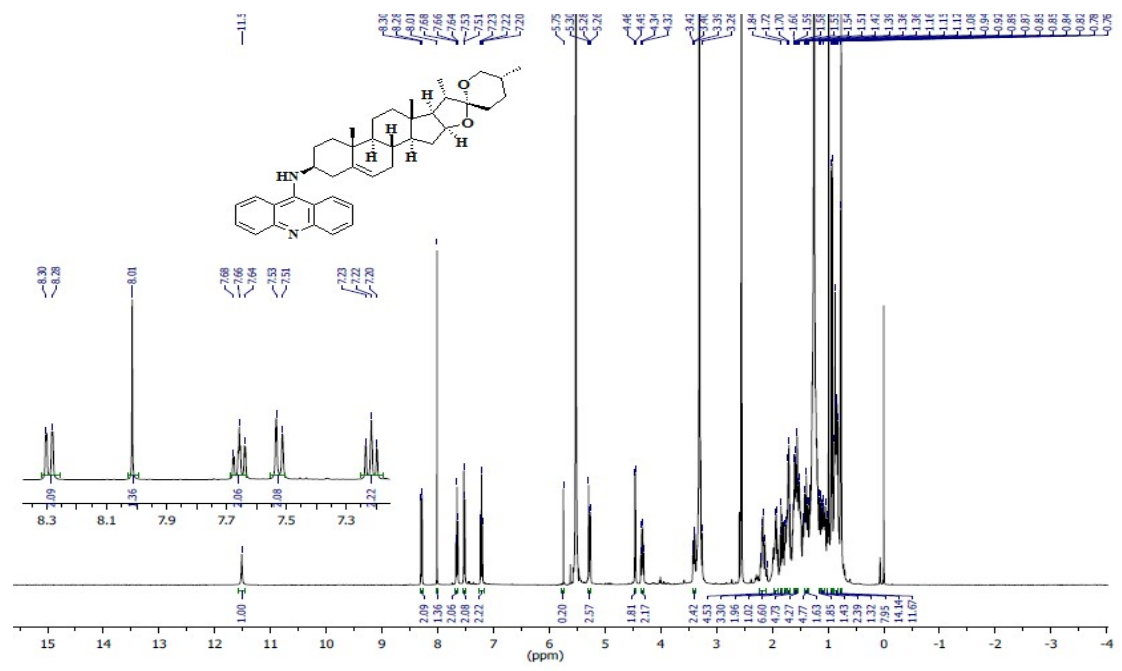

Fig. S16.  $^1\text{H}$  NMR spectrum of D6

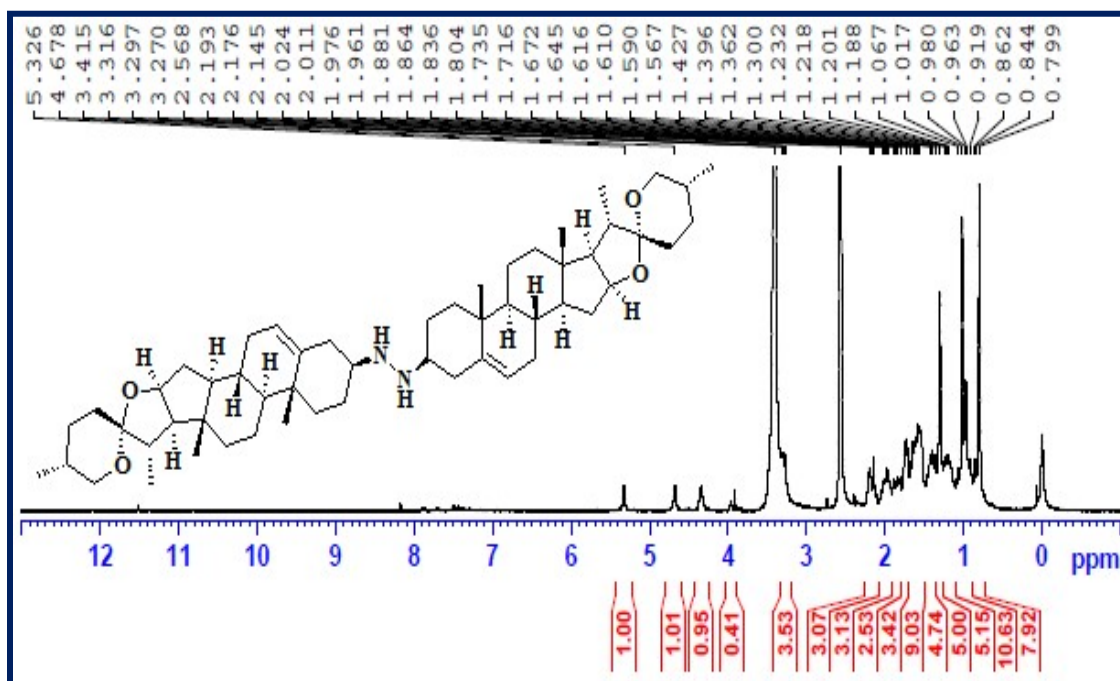

Fig. S17.  $^1\text{H}$  NMR spectrum of D7

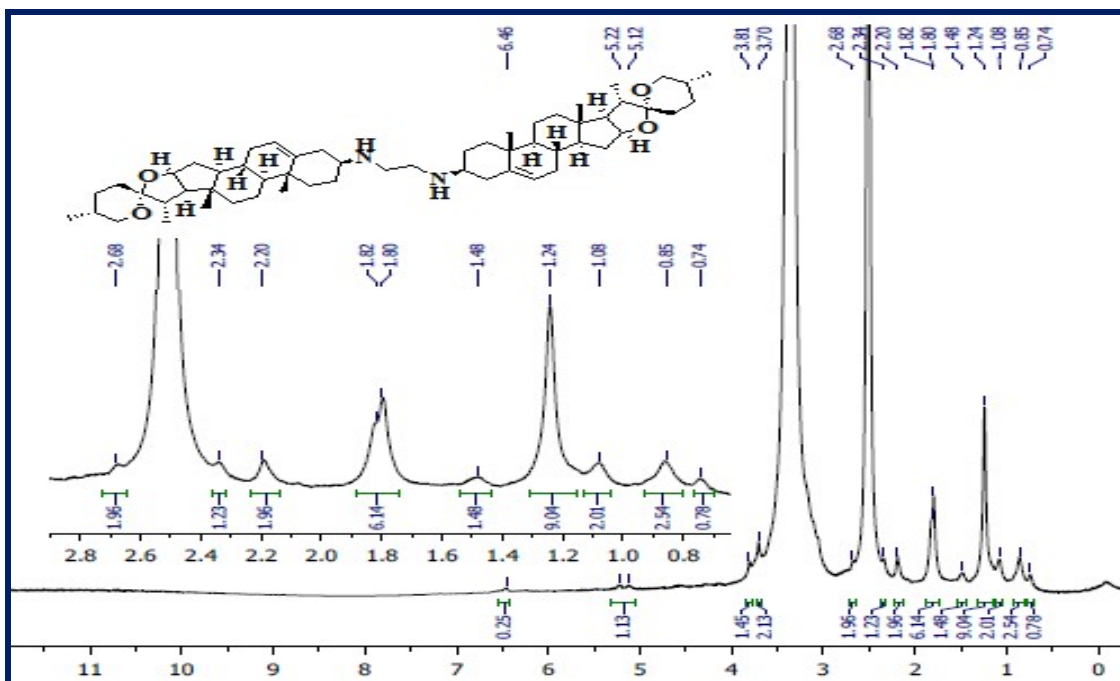

Fig. S18.  $^1\text{H}$  NMR spectrum of D8

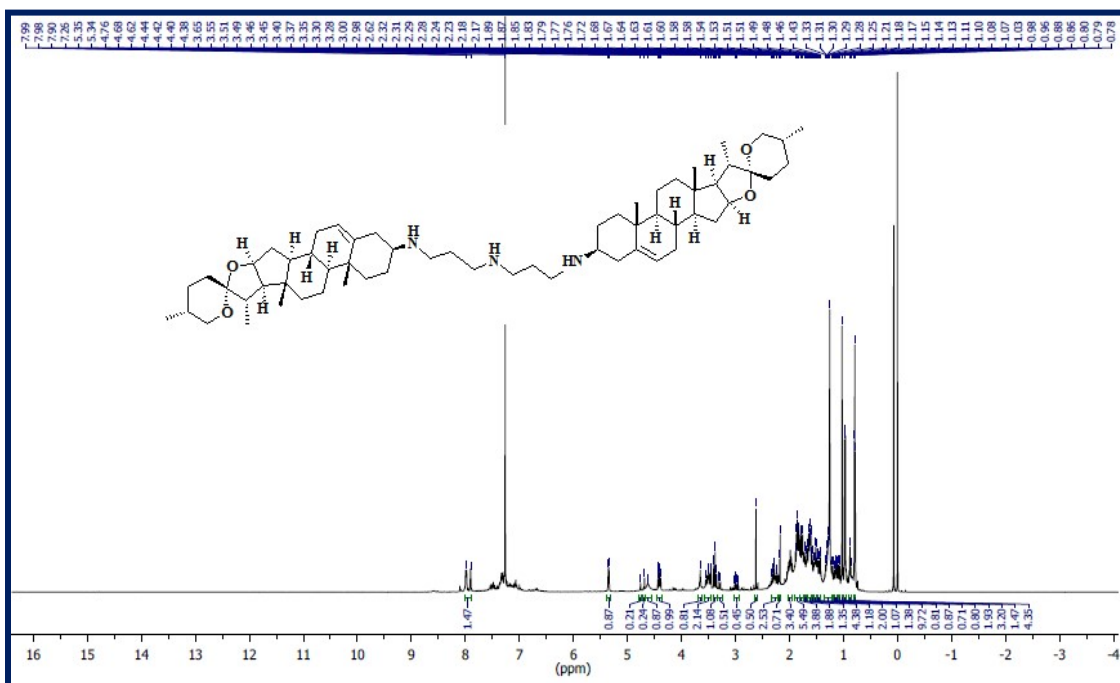

Fig. S19.  $^1\text{H}$  NMR spectrum of D9



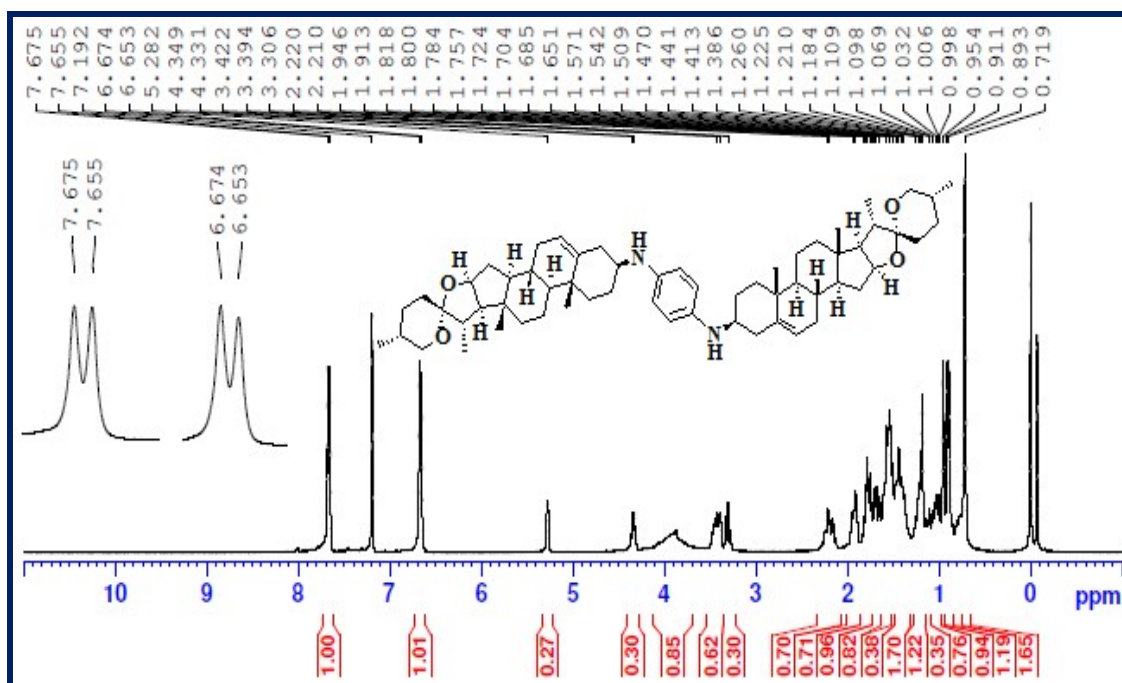

Fig. S20.  $^1\text{H}$  NMR spectrum of D10

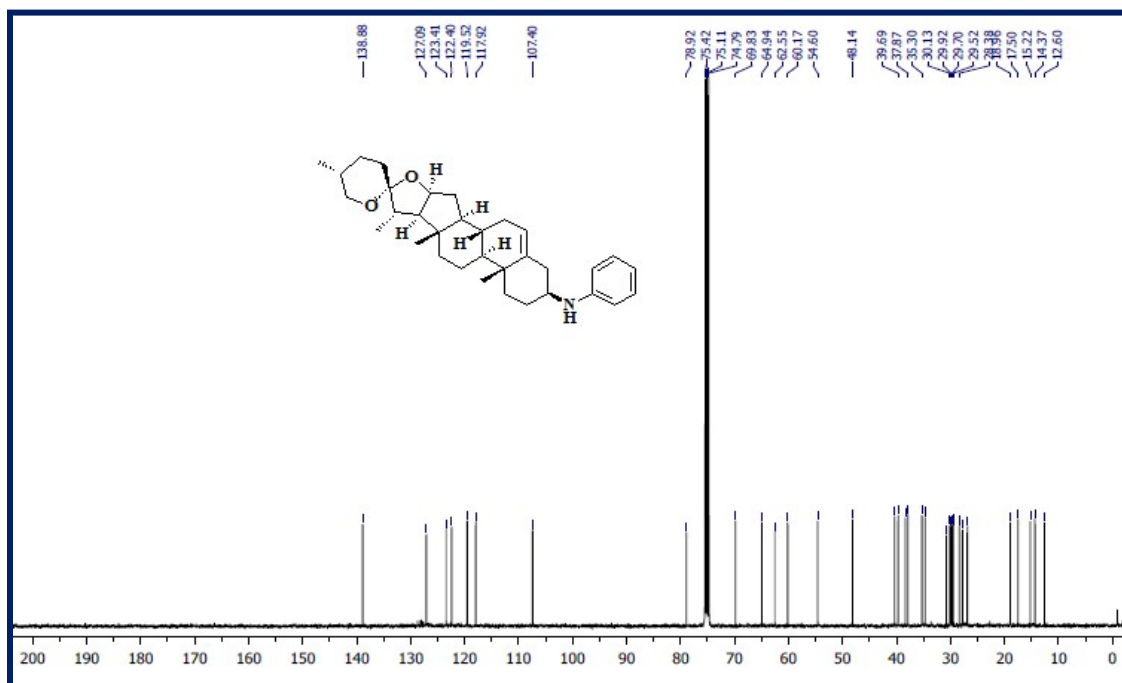

Fig. S21.  $^{13}\text{C}$  NMR spectrum of D1

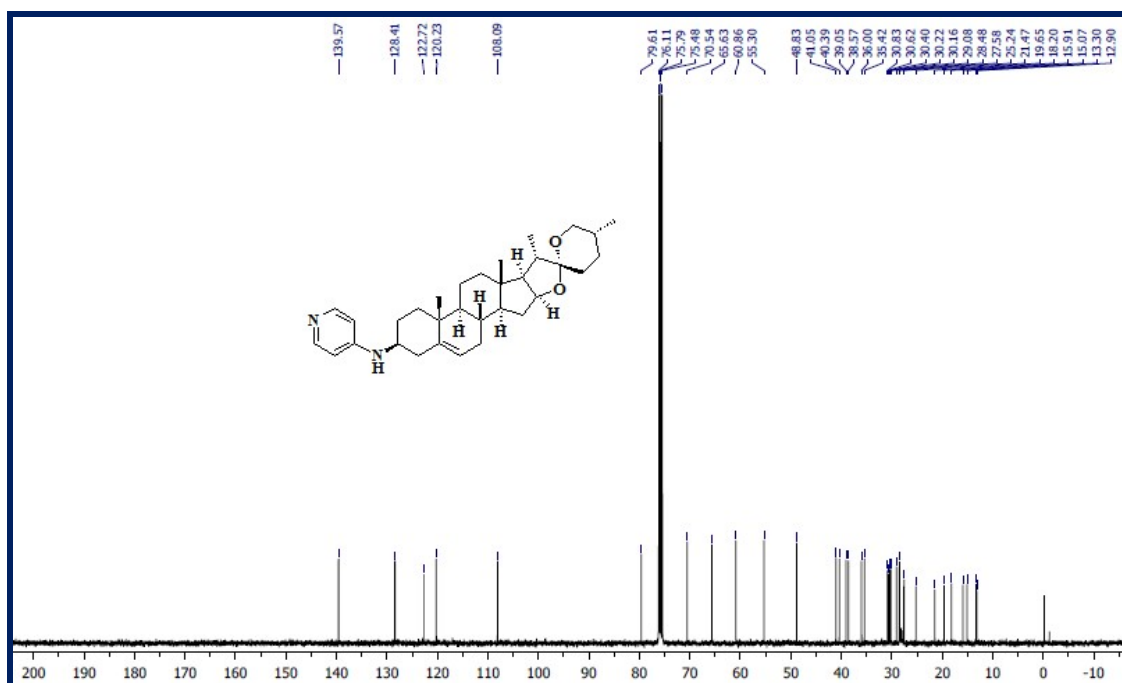

Fig. S22.  $^{13}\text{C}$  NMR spectrum of D2

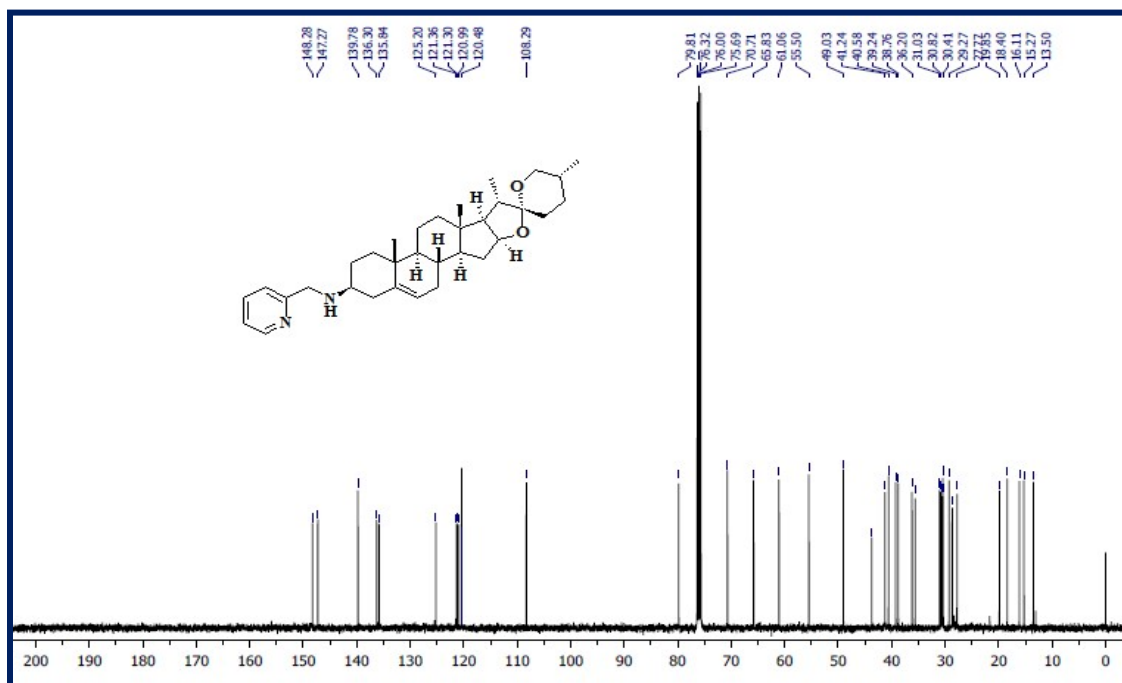

Fig. S23.  $^{13}\text{C}$  NMR spectrum of D3

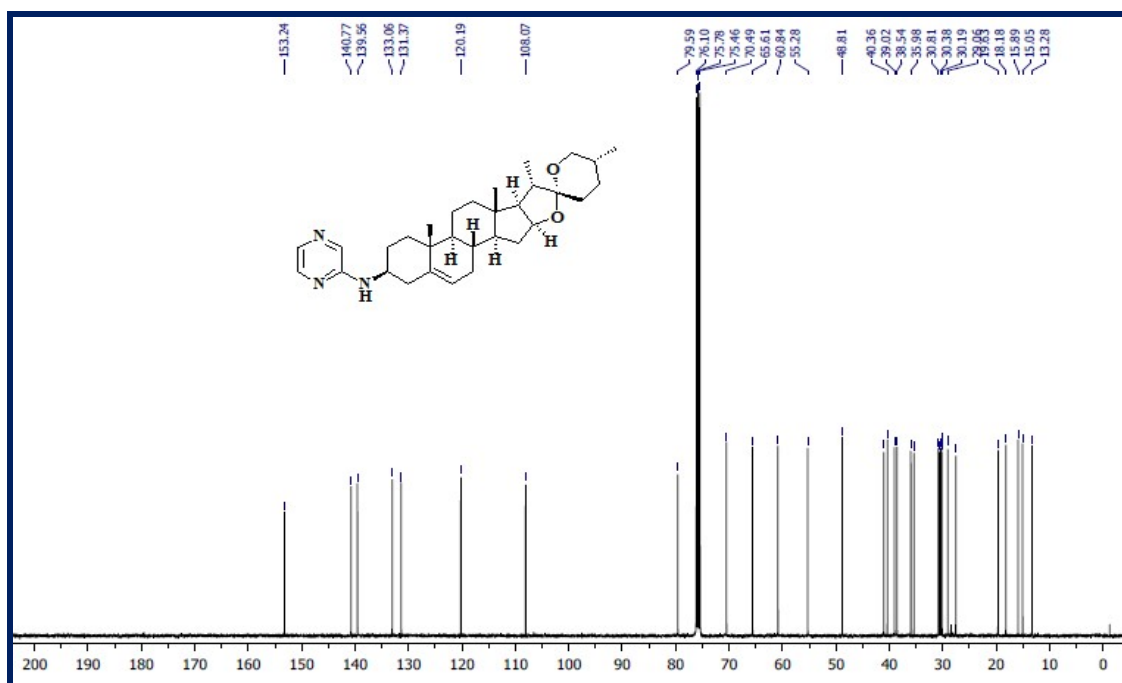

Fig. S24. <sup>13</sup>C NMR spectrum of D4

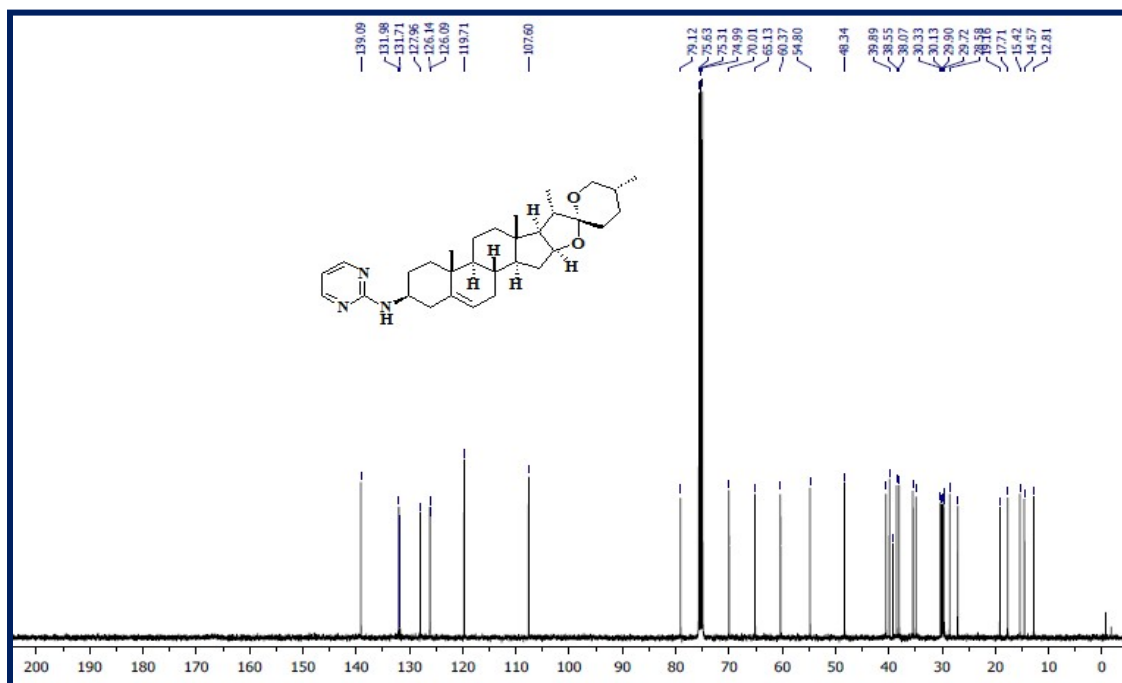

Fig. S25. <sup>13</sup>C NMR spectrum of D5

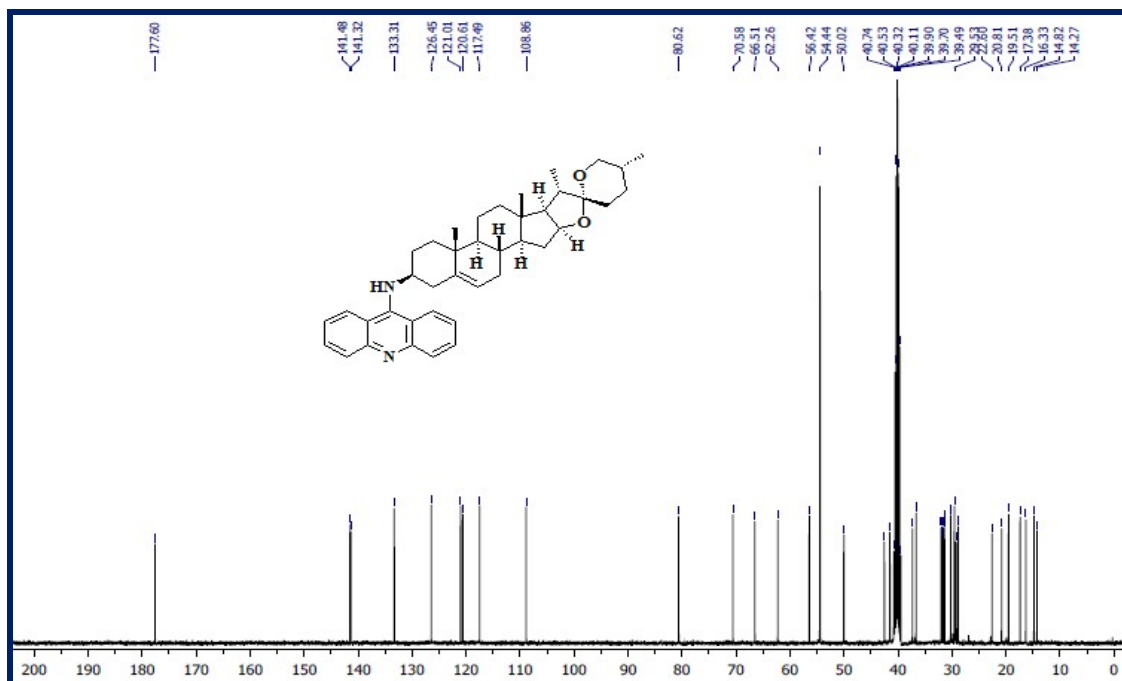

Fig. S26.  $^{13}\text{C}$  NMR spectrum of D6

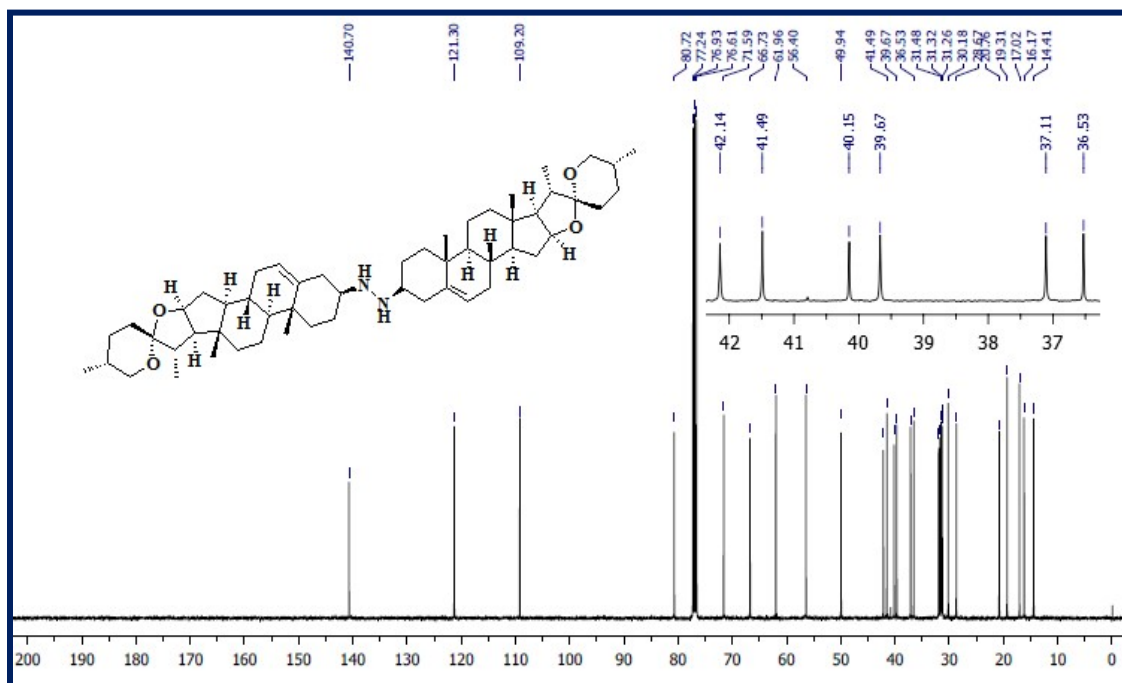

Fig. S27.  $^{13}\text{C}$  NMR spectrum of D7

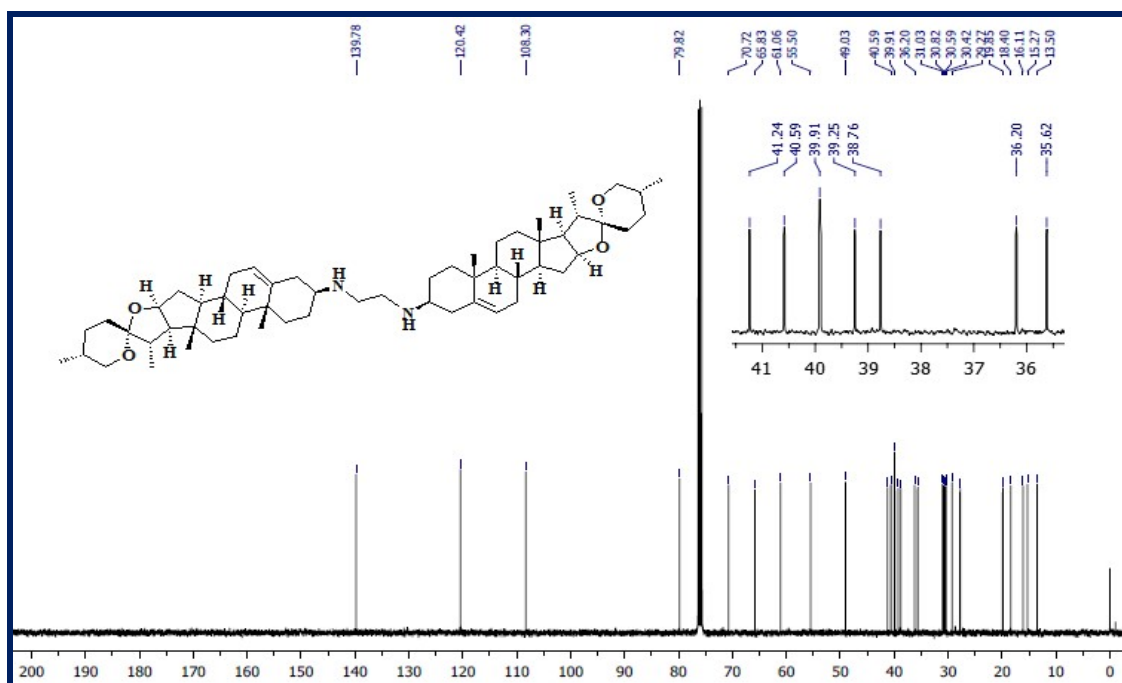

Fig. S28.  $^{13}\text{C}$  NMR spectrum of D8

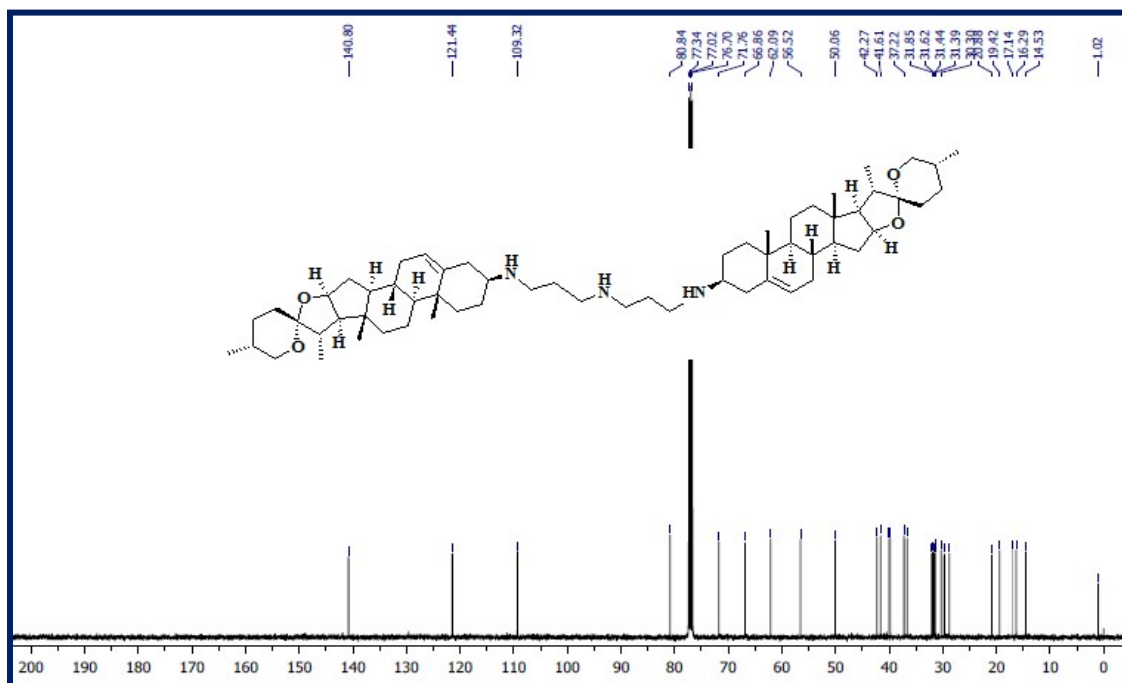

Fig. S29.  $^{13}\text{C}$  NMR spectrum of D9

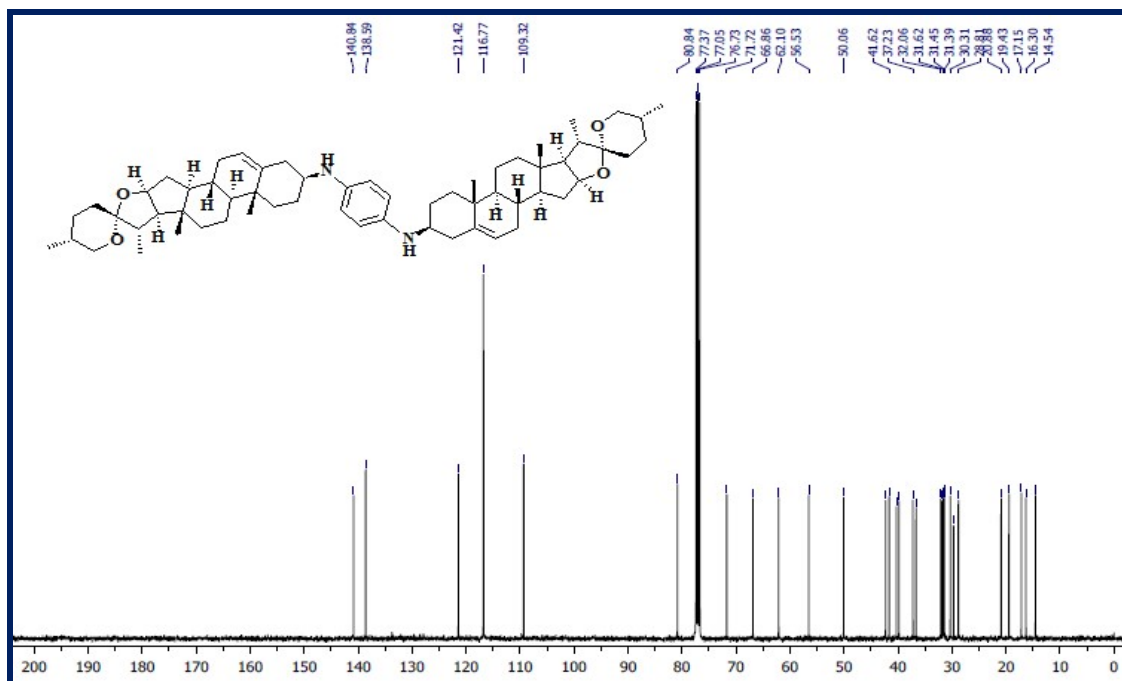

Fig. S30. <sup>13</sup>C NMR spectrum of D10

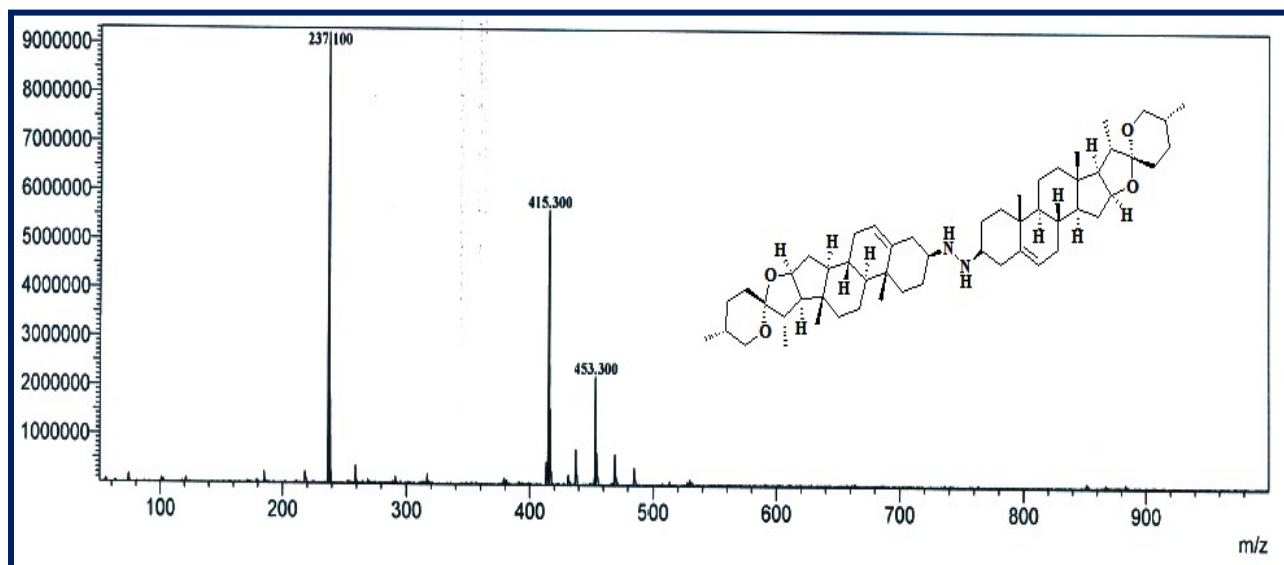

Fig. S31. LCMS spectrum of D6

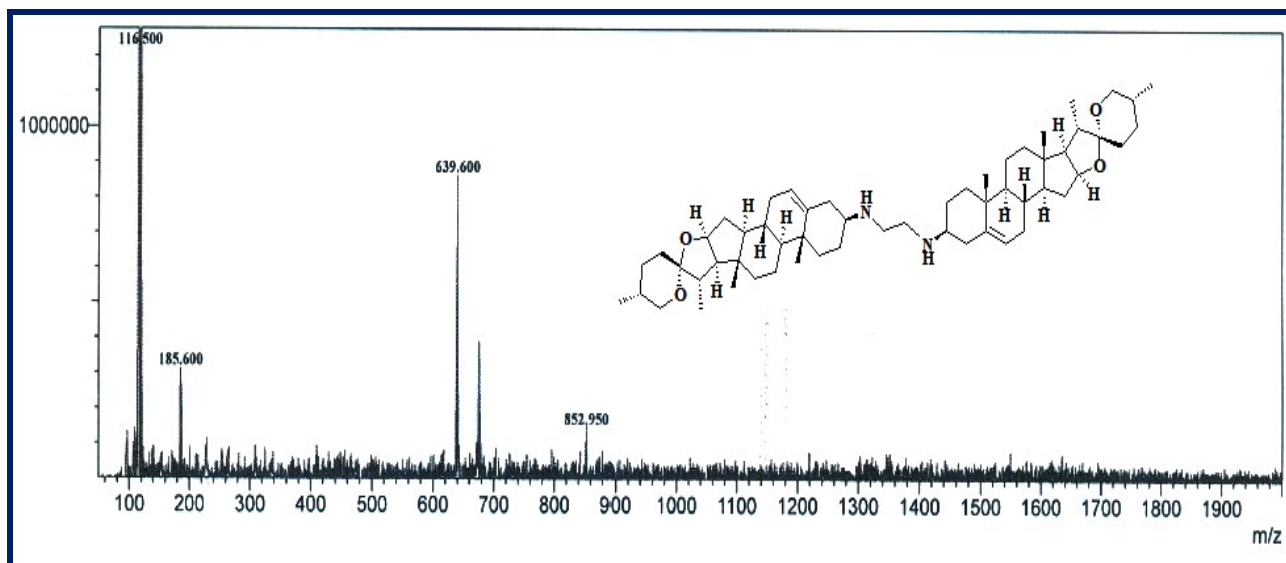

**Fig. S32.** LCMS spectrum of D7

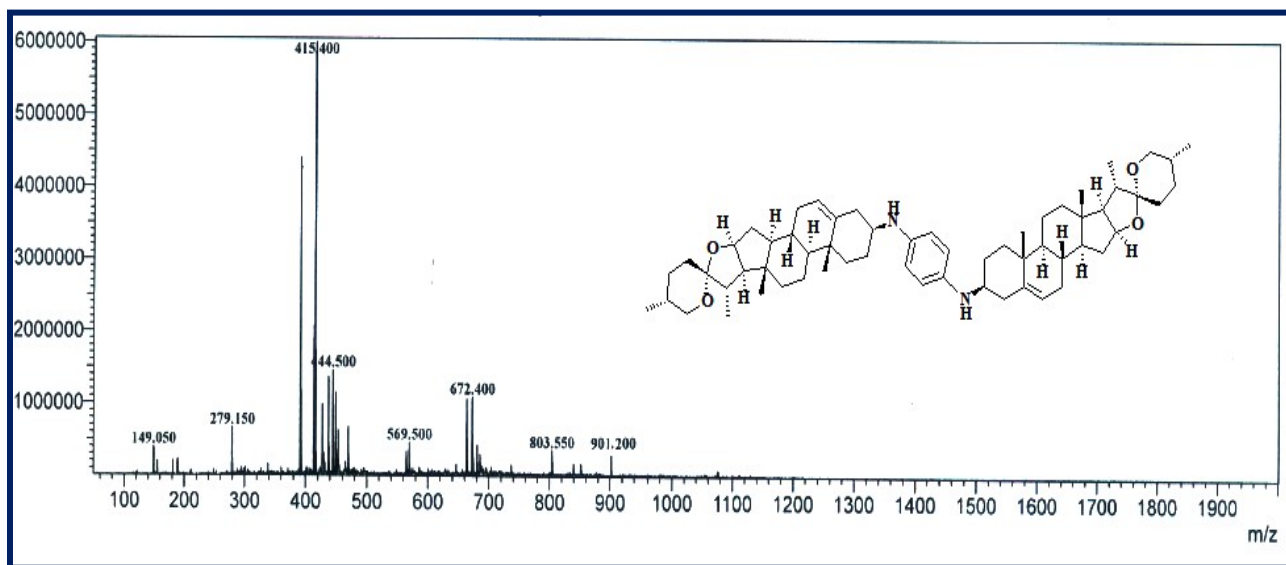

**Fig. S33.** LCMS spectrum of D10

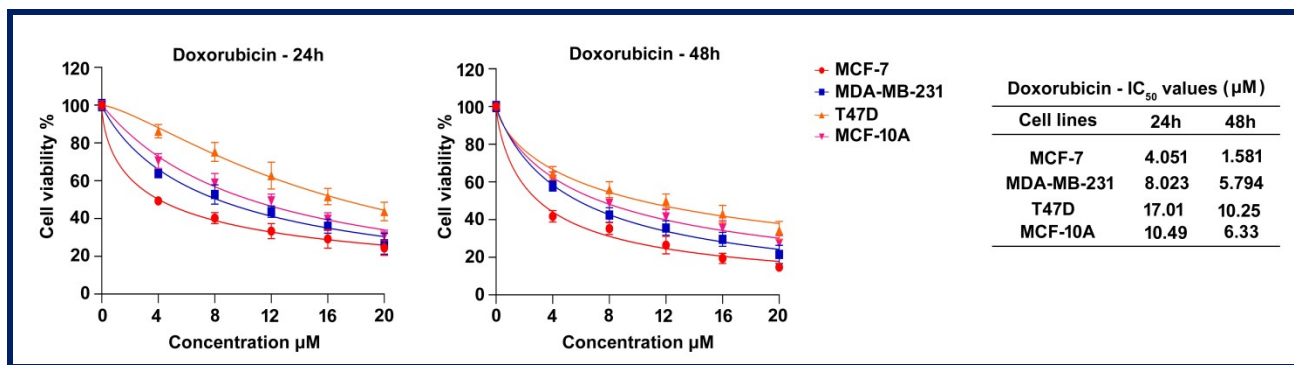

**Fig. S34.** Activity of doxorubicin on breast cancer cells for an incubation period of 24 and 48 h.

## References

- S1. A. I. Vogel, Textbook of Practical Organic Chemistry, 5<sup>th</sup> ed., Longman, London, 1989, 268.
- S2. Y. Guo, K. Fhayli, S. Li, Y. Yang, A. Mashat and N. M. Khashab, *RSC Adv.*, 2013, **3**, 17693-17695.
- S3. S. Selvamurugan, R. Ramachandran, P. Vijayan, R. Manikandan, G. Prakash, P. Viswanathamurthi, K. Velmurugan, R. Nandhakumar and A. Endo, *Polyhedron*, 2016, **107**, 57-67.
- S4. M. Muralisankar, S. Sujith, N. S. P. Bhuvanesh and A. Sreekanth, *Polyhedron*, 2016, **118**, 103-117.
- S5. Y. Li, Z. Y. Yang and J. C. Wu, *Eur. J. Med. Chem.*, 2010, **45**, 5692-5701.



- S6. G. Kalaiarasi, Ruchi Jain, H. Puschmann, S. Poorna Chandrika, K. Preethi and R. Prabhakaran, *New J. Chem.*, 2017, **41**, 2543-2560.
- S7. M. Muralisankar, J. Haribabu, N. S. P. Bhuvanesh, R. Karvembu and A. Sreekanth, *Inorg. Chim. Acta*, 2016, **449**, 82-95.
- S8. P. Vijayan, P. Viswanathamurthi, K. Velmurugan, R. Nandhakumar, M. D. Balakumaran, P. T. Kalaichelvan and J. C. Malecki, *RSC Adv.*, 2015, **5**, 103321-103342.
- S9. B. S. Creaven, M. Devereux, D. Karcz, A. Kellett, M. McCann, A. Noble and M. Walsh, *J. Inorg. Biochem.*, 2009, **103**, 1196-1203.
- S10. M. Muthu Tamizh, B. F. T. Cooper, C. L. B. Macdonald and R. Karvembu, *Inorg. Chim. Acta*, 2013, **394**, 391-400.
- S11. G. Kalaiarasi, S. Rex Jeya Rajkumar, S. Dharani, V. M. Lynch and R. Prabhakaran, *Inorg. Chim. Acta*, 2018, **471**, 759-776.
- S12. P. Kalaivani, R. Prabhakaran, F. Dallemer, E. Vaishnavi, P. Poornima, V. Vijaya Padma, R. Renganathan and K. Natarajan, *J. Organomet. Chem.*, 2014, **762**, 67-80.
- S13. A. Castineiras, N. F. Hermida, I. G. Santos and G. Rodriguez, *Dalton Trans.*, 2012, **41**, 13486-13495.
- S14. G. Kalaiarasi, S. Dharani, V. M. Lynch and R. Prabhakaran, *Dalton Trans.*, 2019, **48**, 12496-12511.
- S15. P. Kalaivani, R. Prabhakaran, F. Dallemer, P. Poornima, E. Vaishnavi, E. Ramachandran, V. Vijaya Padma, R. Renganathan and K. Natarajan, *Metallomics*, 2012, **4**, 101-113.
- S16. S. Dharani, G. Kalaiarasi, D. Sindhuja, V. M. Lynch, R. Shankar, R. Karvembu and R. Prabhakaran, *Inorg. Chem.*, 2019, **58**, 8045-8055.
